# Supplementary material for: Characterization of Three Novel Viruses from the Families Nyamiviridae, Orthomyxoviridae, and Peribunyaviridae, Isolated from Dead Birds Collected during West Nile Virus Surveillance in Harris County, Texas
Source: PubMed Central journal article supplement (PMC6832935; doi:10.3390/v11100927), 2019-10-10
Supplement: viruses-11-00927-s001.pdf [file viruses-11-00927-s001.pdf]

**Suppl. Table S1.** Amino acid sequence homology (p-distances) of the L proteins of SNVV and selected nyamiviruses.

| Genus    | <i>Nyavirus</i> |      |       |      | <i>Orinovirus</i> | <i>Soeyvirus</i> | <i>Berhavirus</i> |         |         | <i>Crustavirus</i> |         |        | <i>Tapwovirus</i> |        |        |
|----------|-----------------|------|-------|------|-------------------|------------------|-------------------|---------|---------|--------------------|---------|--------|-------------------|--------|--------|
| Virus    | SJCV            | NYAV | MIDWV | SNVV | OCOV              | SbCNCV-1         | BhRLV-4           | BhRLV-5 | BhRLV-3 | BhRLV-6            | WICV-12 | WzCV-1 | WzTV-1            | FexV-4 | FfuV-1 |
| SJCV     |                 |      |       |      |                   |                  |                   |         |         |                    |         |        |                   |        |        |
| NYAV     | 63.1            |      |       |      |                   |                  |                   |         |         |                    |         |        |                   |        |        |
| MIDWV    | 63.9            | 82.4 |       |      |                   |                  |                   |         |         |                    |         |        |                   |        |        |
| SNVV     | 62.4            | 66.7 | 67.0  |      |                   |                  |                   |         |         |                    |         |        |                   |        |        |
| OCOV     | 30.4            | 30.6 | 31.3  | 29.8 |                   |                  |                   |         |         |                    |         |        |                   |        |        |
| SbCNCV-1 | 28.7            | 29.8 | 29.7  | 29.5 | 26.5              |                  |                   |         |         |                    |         |        |                   |        |        |
| BhRLV-4  | 28.3            | 28.5 | 28.5  | 28.0 | 27.0              | 26.3             |                   |         |         |                    |         |        |                   |        |        |
| BhRLV-5  | 29.5            | 29.7 | 30.0  | 28.9 | 27.6              | 25.0             | 44.6              |         |         |                    |         |        |                   |        |        |
| BhRLV-3  | 30.0            | 31.6 | 31.1  | 31.2 | 27.7              | 27.2             | 32.5              | 33.4    |         |                    |         |        |                   |        |        |
| BhRLV-6  | 23.9            | 22.9 | 23.0  | 22.8 | 24.5              | 23.0             | 21.0              | 21.9    | 23.1    |                    |         |        |                   |        |        |
| WICV-12  | 25.1            | 25.8 | 25.8  | 24.7 | 24.7              | 23.7             | 24.4              | 23.0    | 24.5    | 33.9               |         |        |                   |        |        |
| WzCV-1   | 24.6            | 23.8 | 22.9  | 23.9 | 25.6              | 22.6             | 22.2              | 22.2    | 23.2    | 47.7               | 36.5    |        |                   |        |        |
| WzTV-1   | 26.3            | 27.2 | 26.7  | 26.1 | 26.5              | 26.8             | 22.8              | 23.8    | 26.4    | 21.3               | 23.0    | 22.8   |                   |        |        |
| FexV-4   | 31.5            | 31.8 | 32.2  | 32.5 | 42.0              | 27.5             | 28.1              | 27.8    | 30.9    | 23.4               | 25.4    | 23.6   | 24.9              |        |        |
| FfuV-1   | 30.5            | 31.4 | 31.8  | 32.1 | 42.2              | 27.7             | 27.9              | 27.6    | 30.2    | 23.4               | 25.5    | 23.7   | 25.2              | 86.1   |        |

**Suppl. Table S2.** Amino acid sequence homology (p-distances) of the PA proteins of MCRV and selected orthomyxoviruses.

|        | MCRV | LCHV | QRFV | TLKV | ARAV | WFBV | BhOMV1 |
|--------|------|------|------|------|------|------|--------|
| MCRV   |      |      |      |      |      |      |        |
| LCHV   | 38.6 |      |      |      |      |      |        |
| QRFV   | 21.0 | 21.1 |      |      |      |      |        |
| TLKV   | 21.9 | 21.0 | 75.2 |      |      |      |        |
| ARAV   | 20.5 | 22.6 | 52.9 | 55.1 |      |      |        |
| WFBV   | 20.1 | 21.8 | 54.5 | 54.8 | 54.8 |      |        |
| BhOMV1 | 21.2 | 21.9 | 29.6 | 29.2 | 29.2 | 30.4 |        |

**Suppl. Table S3.** Amino acid sequence homology (p-distances) of the PB1 proteins of MCRV and selected orthomyxoviruses.

|        | MCRV | LCHV | QRFV | TLKV | ARAV | WFBV | BhOMV1 |
|--------|------|------|------|------|------|------|--------|
| MCRV   |      |      |      |      |      |      |        |
| LCHV   | 60.4 |      |      |      |      |      |        |
| QRFV   | 40.2 | 39.8 |      |      |      |      |        |
| TLKV   | 39.4 | 39.6 | 86.9 |      |      |      |        |
| ARAV   | 40.0 | 39.6 | 71.4 | 71.7 |      |      |        |
| WFBV   | 39.6 | 39.8 | 70.4 | 70.8 | 73.4 |      |        |
| BhOMV1 | 44.7 | 41.0 | 43.0 | 43.6 | 46.9 | 45.4 |        |

**Suppl. Table S4.** Amino acid sequence homology (p-distance) of the PB2 proteins of MCRV and selected orthomyxoviruses.

|        | MCRV | LCHV | QRFV | TLKV | ARAV | WFBV | BhOMV1 |
|--------|------|------|------|------|------|------|--------|
| MCRV   |      |      |      |      |      |      |        |
| LCHV   | 32.7 |      |      |      |      |      |        |
| QRFV   | 15.9 | 17.3 |      |      |      |      |        |
| TLKV   | 15.9 | 16.7 | 84.1 |      |      |      |        |
| ARAV   | 16.1 | 15.4 | 53.9 | 53.7 |      |      |        |
| WFBV   | 17.0 | 17.6 | 53.4 | 54.3 | 55.4 |      |        |
| BhOMV1 | 13.7 | 14.7 | 25.7 | 24.7 | 25.9 | 24.6 |        |

**Suppl. Table S5.** Amino acid sequence homology (p-distances) of the NP proteins of MCRV and selected orthomyxoviruses.

|        | MCRV | LCHV | QRFV | TLKV | ARAV | WFBV | BhOMV1 |
|--------|------|------|------|------|------|------|--------|
| MCRV   |      |      |      |      |      |      |        |
| LCHV   | 39.5 |      |      |      |      |      |        |
| QRFV   | 21.6 | 26.0 |      |      |      |      |        |
| TLKV   | 21.4 | 26.8 | 87.9 |      |      |      |        |
| ARAV   | 21.6 | 25.4 | 49.7 | 52.0 |      |      |        |
| WFBV   | 21.4 | 25.4 | 48.0 | 49.9 | 52.4 |      |        |
| BhOMV1 | 25.6 | 26.2 | 31.3 | 32.6 | 31.7 | 30.9 |        |

**Suppl. Table S6.** Amino acid sequence homology (p-distances) of the HA proteins of MCRV and selected orthomyxoviruses.

|        | MCRV | LCHV | QRFV | TLKV | ARAV | WFBV | BhOMV1 |
|--------|------|------|------|------|------|------|--------|
| MCRV   |      |      |      |      |      |      |        |
| LCHV   | 44.0 |      |      |      |      |      |        |
| QRFV   | 25.6 | 22.7 |      |      |      |      |        |
| TLKV   | 25.2 | 23.3 | 85.7 |      |      |      |        |
| ARAV   | 25.0 | 24.2 | 43.7 | 44.3 |      |      |        |
| WFBV   | 25.0 | 23.1 | 45.4 | 45.4 | 48.1 |      |        |
| BhOMV1 | 23.5 | 23.9 | 29.0 | 27.7 | 26.7 | 23.5 |        |
